# Supplementary material for: Whole mitochondrial DNA sequencing in Alpine populations and the genetic history of the Neolithic Tyrolean Iceman
Source: PubMed Central journal article supplement (PMC4725900; doi:10.1038/srep18932), 2016-01-14

## Whole mitochondrial DNA sequencing in Alpine populations and the genetic history of the Neolithic Tyrolean Iceman

Coia Valentina, Cipollini Giovanna, Anagnostou Paolo, Maixner Frank, Battaglia Cinzia, Brisighelli Francesca, Gómez-Carballa Alberto, Destro Bisol Giovanni, Salas Antonio, Zink Albert

### Contents

**Figure S1.** Approximate places of origin of the K alpine samples (yellow stars) analyzed in this study and place of discovery of the Tyrolean Iceman (red star). Map was created by Kathrin Renner (Eurac-Research) using ESRI 2011 ArcGIS Desktop: Release 10.

**Figure S2.** Median Joining network of 42 K sequences from alpine populations analyzed in this study more 6 K sequences from south Tyrolean area<sup>1</sup> (see also Table S2). Weight at the different positions were assigned according to<sup>2</sup>.

**Figure S3.** Bayesian skyline plot showing changes thought the time (kya, abscissa) of the effective population size ( $N_e$ , ordinate) of haplogroup K1 in the Alps.

**Table S1.** Total K Alpine samples analyzed in this study. This table is provided in a separate file.

**Table S2.** Total K1 mitogenomes used in this study. This table is provided in a separate file.

**Table S3.** TMCRA estimates of K1 haplogroup and ist sub-clades. This table is provided in a separate file.

### References

1. Pichler, I. *et al.* Drawing the history of the Hutterite population on a genetic landscape: inference from Y-chromosome and mtDNA genotypes. *Eur. J. Hum. Genet.* **18**, 463–470 (2010).
2. Brandstätter, A. *et al.* Timing and deciphering mitochondrial DNA macro-haplogroup R0 variability in Central Europe and Middle East. *BMC Evol. Biol.* **8**, 191 (2008).

Figure S1

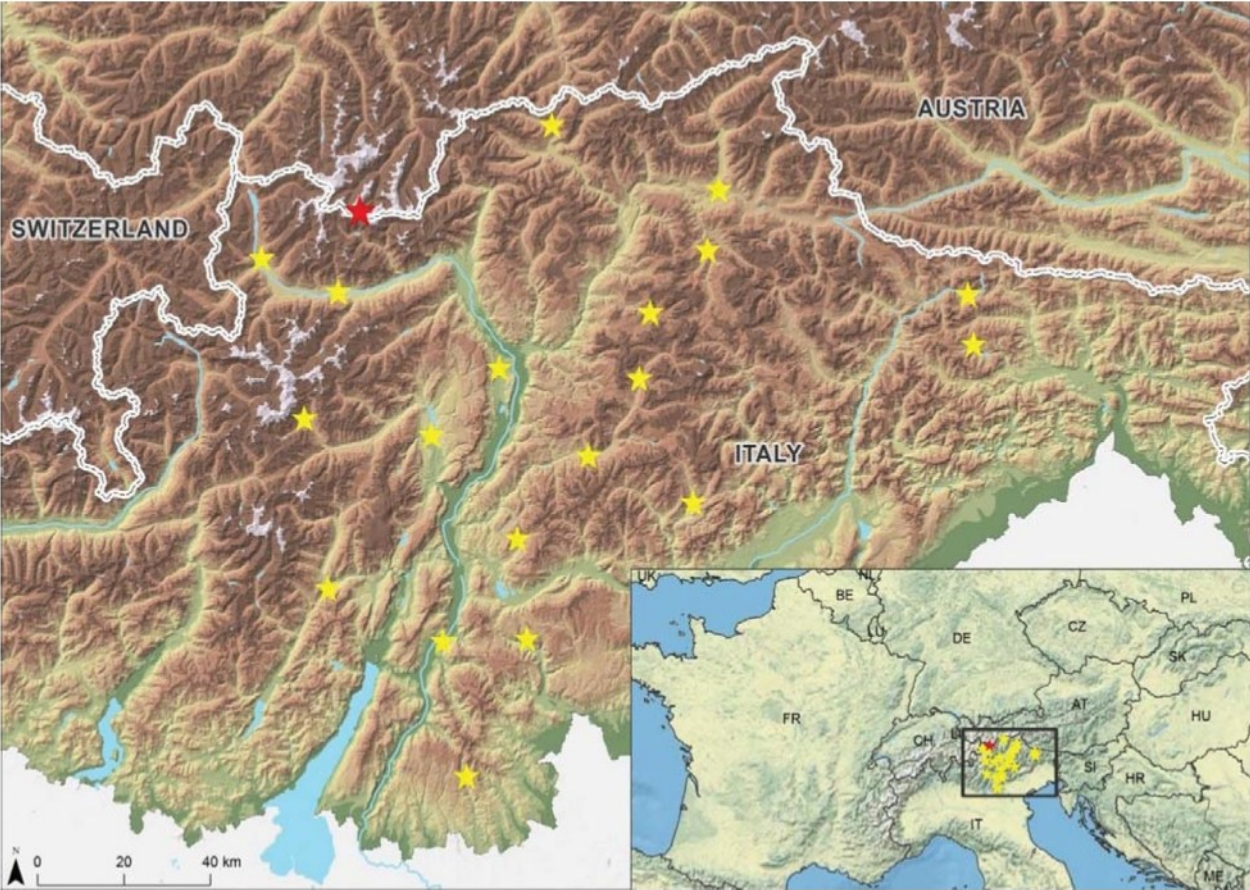

Figure S2

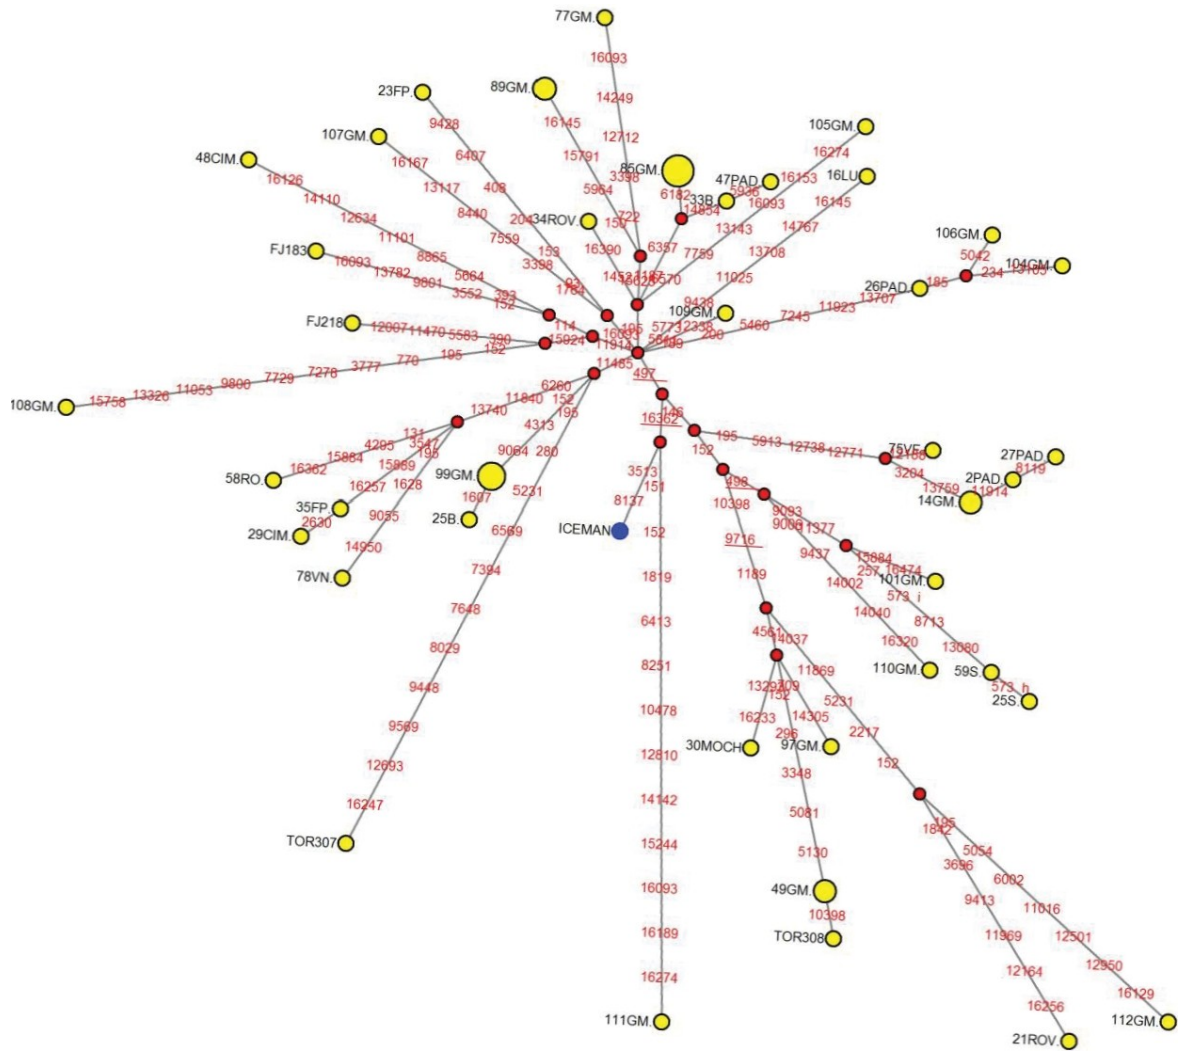

Figure S3

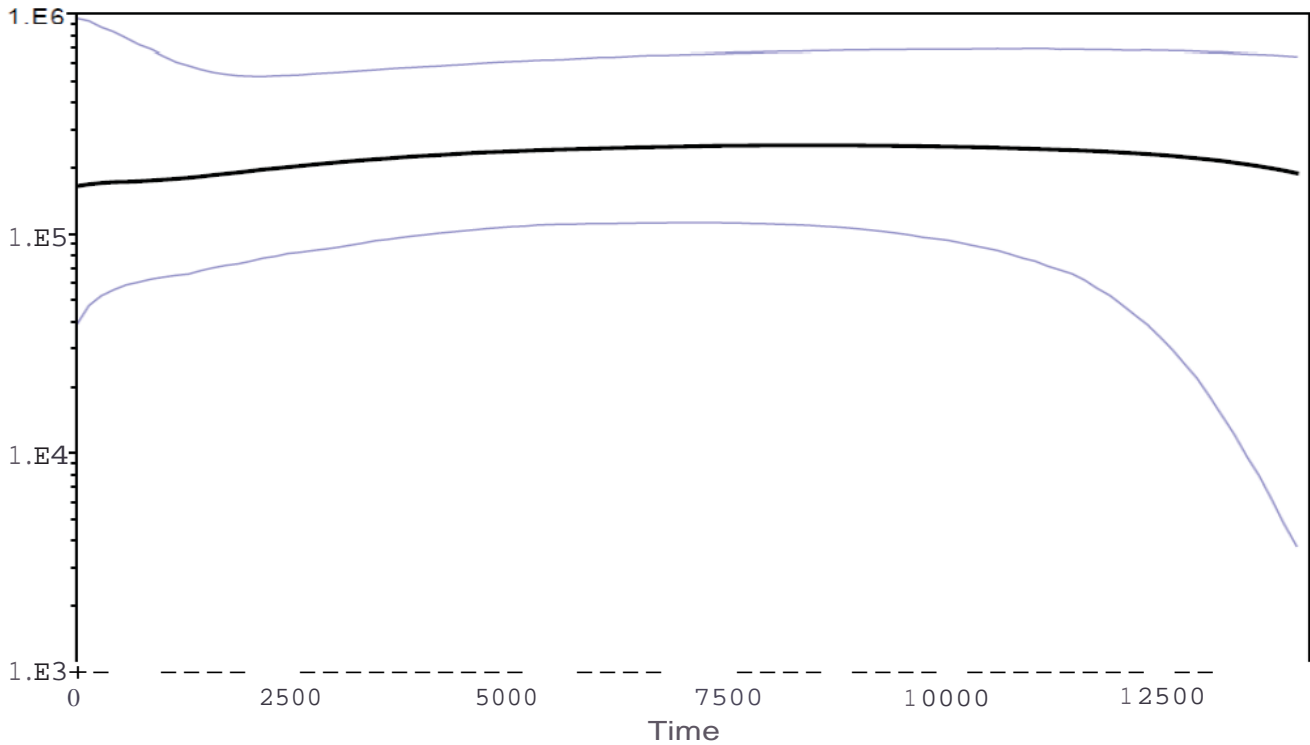

Supplement: srep18932-s1.pdf [file srep18932-s1.pdf]
